# Supplementary material for: Efficient UV-vis-IR light-driven thermocatalytic purification of benzene on a Pt/CeO2nanocomposite significantly promoted by hot electron-induced photoactivation
Source: Royal Society of Chemistry journal article supplement (doi:10.1039/c6en00472e), 2016-12-01
Supplement: c6en00472e1.pdf [file c6en00472e1.pdf]

## Supporting Information

### Efficient UV-Vis-IR light-driven thermocatalytic purification of benzene on Pt/CeO<sub>2</sub> nanocomposite significantly promoted by hot electron-induced photoactivation

Mingyang Mao, Yuanzhi Li,\* Haiqin Lv, Jingtao Hou, Min Zeng, Lu Ren, Hui Huang, Xiujian Zhao

State Key Laboratory of Silicate Materials for Architectures (Wuhan University of Technology), 122

Luoshi Road, Wuhan 430070, P. R. China. Email: liyuanzhi66@hotmail.com

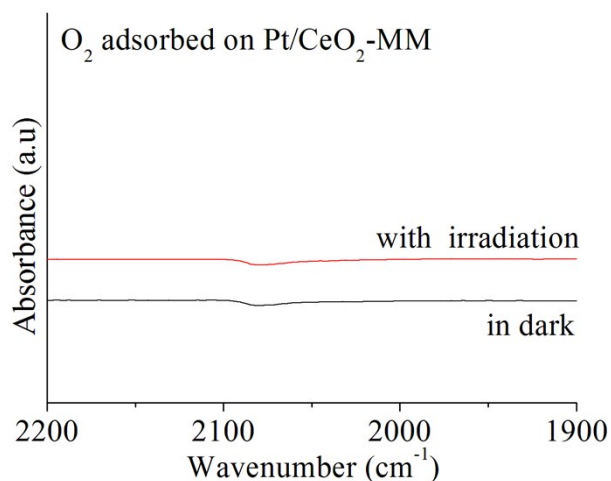

**Figure S1.** In-situ FTIR spectra of O<sub>2</sub> adsorbed on Pt/CeO<sub>2</sub>-MM in the dark and with the solar light irradiation.

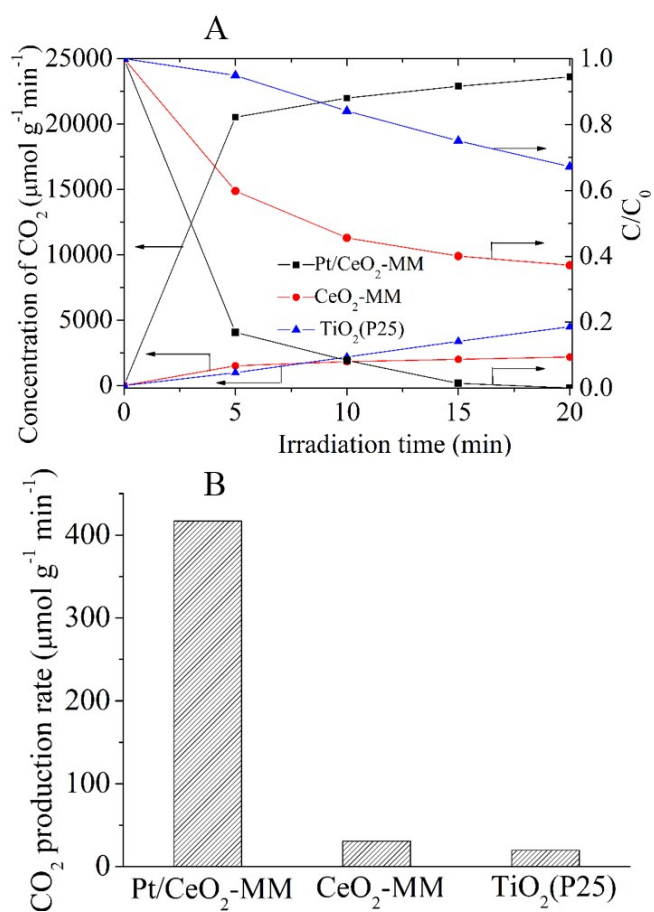

**Figure S2.** Time course of acetone concentration and CO<sub>2</sub> concentration (A), and the  $r_{\text{CO}_2}$  (B) of the samples under the full solar spectrum irradiation.
